# Estimating smooth and sparse neural receptive fields with a flexible spline basis

Ziwei Huang<sup>1</sup>, Yanli Ran<sup>1,2</sup>, Thomas Euler<sup>1,2</sup>, and Philipp Berens<sup>1-3</sup>

<sup>1</sup>Institute for Ophthalmic Research, University of Tübingen, Tübingen, Germany

<sup>2</sup>Centre for Integrative Neuroscience, University of Tübingen, Tübingen, Germany

<sup>3</sup>Department of Computer Science, University of Tübingen, Tübingen, Germany

## ABSTRACT

Spatio-temporal receptive field (STRF) models are frequently used to approximate the computation implemented by a sensory neuron. Typically, such STRFs are assumed to be smooth and sparse. Current state-of-the-art approaches for estimating STRFs based empirical Bayes estimation encode such prior knowledge into a prior covariance matrix, whose hyperparameters are learned from the data, and thus provide STRF estimates with the desired properties even with little or noisy data. However, empirical Bayes methods are often not computationally efficient in high-dimensional settings, as encountered in sensory neuroscience. Here we pursued an alternative approach and encode prior knowledge for estimation of STRFs by choosing a set of basis function with the desired properties: a natural cubic spline basis. Our method is computationally efficient, and can be easily applied to Linear-Gaussian and Linear-Nonlinear-Poisson models as well as more complicated Linear-Nonlinear-Linear-Nonlinear cascade model or spike-triggered clustering methods. We compared the performance of spline-based methods to no-spline ones on simulated and experimental data, showing that spline-based methods consistently outperformed the no-spline versions. We provide a Python toolbox for all suggested methods (<https://github.com/berenslab/RFEst/>).

## 1 Introduction

Spatiotemporal receptive fields (STRFs) are frequently used in neuroscience to approximate the computation implemented by a sensory neuron. Such models consist typically of one or more linear filters summing up sensory inputs across time and space, followed by a static nonlinearity and a probabilistic output process<sup>1</sup>. For this, different distributions can be used depending on the type of recorded neuronal responses.

The simplest way to estimate the STRF is arguably to compute the spike-triggered average (STA), the average over all stimuli preceding a spike<sup>2</sup>. However, the results of spike-triggered analysis are often noisy due to limited data and prone to be corrupted when the neuron is stimulated with correlated noise or natural stimuli<sup>3</sup>. The maximum likelihood estimate (MLE), also known as whitened-STA (wSTA), does not suffer from such biases, but it requires even more data to converge, making it a less preferred option in many experimental settings.

It has been suggested that these shortcomings can be overcome by computing the maximum a posteriori (MAP) estimates within the framework of Bayesian inference<sup>4</sup>. Under this framework, prior knowledge about STRFs such as sparsity, smoothness<sup>5</sup>, or locality<sup>6</sup> can be encoded into a prior covariance matrix, whose hyperparameters are learnt separately from the data via evidence optimization. These algorithms thus provide STRF estimates with the desired properties even with little or noisy data. Although elegant in theory, the evidence optimization step of this framework is computationally costly: the cubic complexity in the dimensionality of the parameter space renders it difficult to scale to high-dimensional setting as often encountered in sensory neuroscience. Also, current popular implementations of MAP estimates work mostly under the Linear-Gaussian encoding model, which assumes additive Gaussian noise to the neural response, and are restricted to only one filter at a time.

An alternative popular approach to encode prior knowledge for estimating STRFs is to parameterize the STRF with a set of basis functions with the desired properties. In this way, model fitting becomes much more efficient as the number of parameters to be optimized is significantly reduced, and some degree of smoothness is automatically enforced. Previous studies used a raised-cosine basis for 1D retinal ganglion cell STRF in macaque monkey<sup>7</sup> and Gaussian spectral or Morlet wavelet basis for 2D auditory STRF in ferrets<sup>8</sup>. Those basis functions are chosen to capture certain STRF properties in their corresponding studies, thus they are relatively inflexible to generalize to other settings. Besides, they are typically controlled by multiple hyperparameters, which creates a burdensome and time-consuming model selection process.

Here, we propose to use an alternative basis for receptive field inference: natural cubic splines. These are known as the smoothest possible interpolant and can be easily extended to high-dimensional settings with minimal assumptions and

few hyperparameters<sup>9</sup>. This spline basis can be incorporated into a wide-range of existing receptive field models (Figure 1), such as the Linear-Gaussian (LG) and the Linear-Nonlinear-Poisson (LNP) model<sup>7,10</sup> for single STRF estimation as well as Linear-Nonlinear-Linear-Nonlinear (LNLN) cascade models<sup>11,12</sup> and spike-triggered clustering methods<sup>12,13</sup> for multiple subunits estimation. When combined with proper regularization, smooth and sparse STRFs can be retrieved with very little data and in an computationally efficient manner, while their predictive performance reaches state-of-the-art level when compared with previous methods. We provide all developed methods as part of the RFEST toolbox.

## 2 Results

We developed the RFEST toolbox for spline-based STRF estimation in various models, including the single-filter LG and LNP models as well as the multi-filters LNLN cascade model (Figure 1). We measured the performance of the enhanced models and compared it with their no-spline versions or other previous methods, using simulated data as well as neural recordings from the retina and the visual cortex. For the simulated benchmark data, we measured the mean squared error (MSE) between the ground truth STRF and the estimated STRFs using various methods and studied its dependence on the amount of available data. For the experimental data, we measured the correlation between the predicted and measured responses as a performance measure.

### 2.1 Estimating receptive fields from simulated LG, LNP and LNLN models

We first simulated the responses of a sensory neuron  $y$  with additive Gaussian noise using a STRF with 30 time frames and 40 pixels in space in response to white and a pink noise stimulus over 10 trials with different lengths (see Methods 4.1 for details). First, we fit LG models (Figure 1A) to these responses using various STRF estimation techniques.

We measured the MSE between the ground truth STRF and the different estimates with respect to the ratio of number of samples  $n$  over the number of parameters  $d$ , averaged over 10 different random seeds (Figure 2A).

As expected, the STA and wSTA approached the ground truth only in high data/feature regimes. For limited data (e.g.  $n/d$  ratio=4), the estimated STRF showed substantial background noise (Figure 2B). In the case of pink noise, the STA was in fact never able to recover the STRF due to the high correlation between pixels in the stimulus<sup>3</sup> (Figure 2C-D).

We also applied more advanced techniques to estimate the STRF to the simulated data, such as automatic smoothness determination (ASD, or MAP with smoothness prior<sup>5</sup>) and automatic locality determination (ALD, or MAP with locality prior<sup>6</sup>). These recovered unbiased estimates with a relatively small amount of data, with ALD outperforming ASD alone for both white and pink noise (Figure 2). However, their runtime for estimating the optimized prior was long due to high computational complexity.

We then applied a spline-based version of the wSTA (SPL MLE) with and without L1 regularization on the basis function coefficients (see Methods). This simple change of basis functions led to an STRF estimator which performed very well, even better than ASD and ALD, especially when using L1 regularization (Figure 2). At the same time, this estimator was also computationally very efficient, as the number of coefficients to be estimated was reduced to the number of basis functions used.

The computation time between MAP-derived and spline-based GLMs was not directly comparable, as the most time-consuming part for MAP was to estimate the prior hyperparameters via evidence optimization, while spline-based GLMs need to resort to cross-validation for selecting the number of basis functions. Importantly, splines with equally-spaced knots rely only on one hyperparameter, the number of basis function  $b$ , also known as the degrees of freedom, for each dimension. A good strategy for selecting an optimal  $b$  would be to measure the performance of SPL MLE over a grid of possible candidates from small to large, then fit SPL w/ L1 with gradient descent to retrieve a sparse STRF.

We can still get a impression of the algorithmic efficiency of each method by profiling their most time-consuming step. Thus, we compared the time taken by the central computation of the STA (see equation 1 in Methods), wSTA (equation 2), MAP (equation 3) and SPL MLE (equation 12) for different amounts of data (Figure 3). Not suprisingly, STA was the fastest, as it had a linear time complexity ( $O(n)$ ) and its computation time depended only on the amount of data ( $n$ ), while wSTA and MAP were the slowest, as they were both limited by the calculation of the inverse matrix, and their computation time grew cubically with respect to the number of coefficients ( $w$ ) in a STRF due to the cubic time complexity ( $O(w^3)$ ) of the matrix inversion. SPL MLE, on the other hand, was less time-consuming than wSTA / MAP, even though the time complexity in general is the same. The improvement was due to the reduced number of model parameters by parameterizing the STRF coefficients with the spline bases ( $b$  coefficients), which resulted in a much smaller covariance matrix to invert ( $O(b^3)$ ). Thus, spline-based STRF estimators offer the best available compromise between STRF estimation quality and computation time.

We next simulated responses  $y$  from an LNP model (Figure 1B) with Poisson noise similar to before using white and pink noise for stimulation. For simplicity, we used an exponential nonlinearity and treated it as known during the estimation procedure.

We then estimated the linear filter from different amounts of data using the STA, wSTA, ASD and ALD, as well as spline and no-spline LNP fitted via gradient descent with L1 regularization (referred as LNP w/ SPL and LNP, respectively). Note that

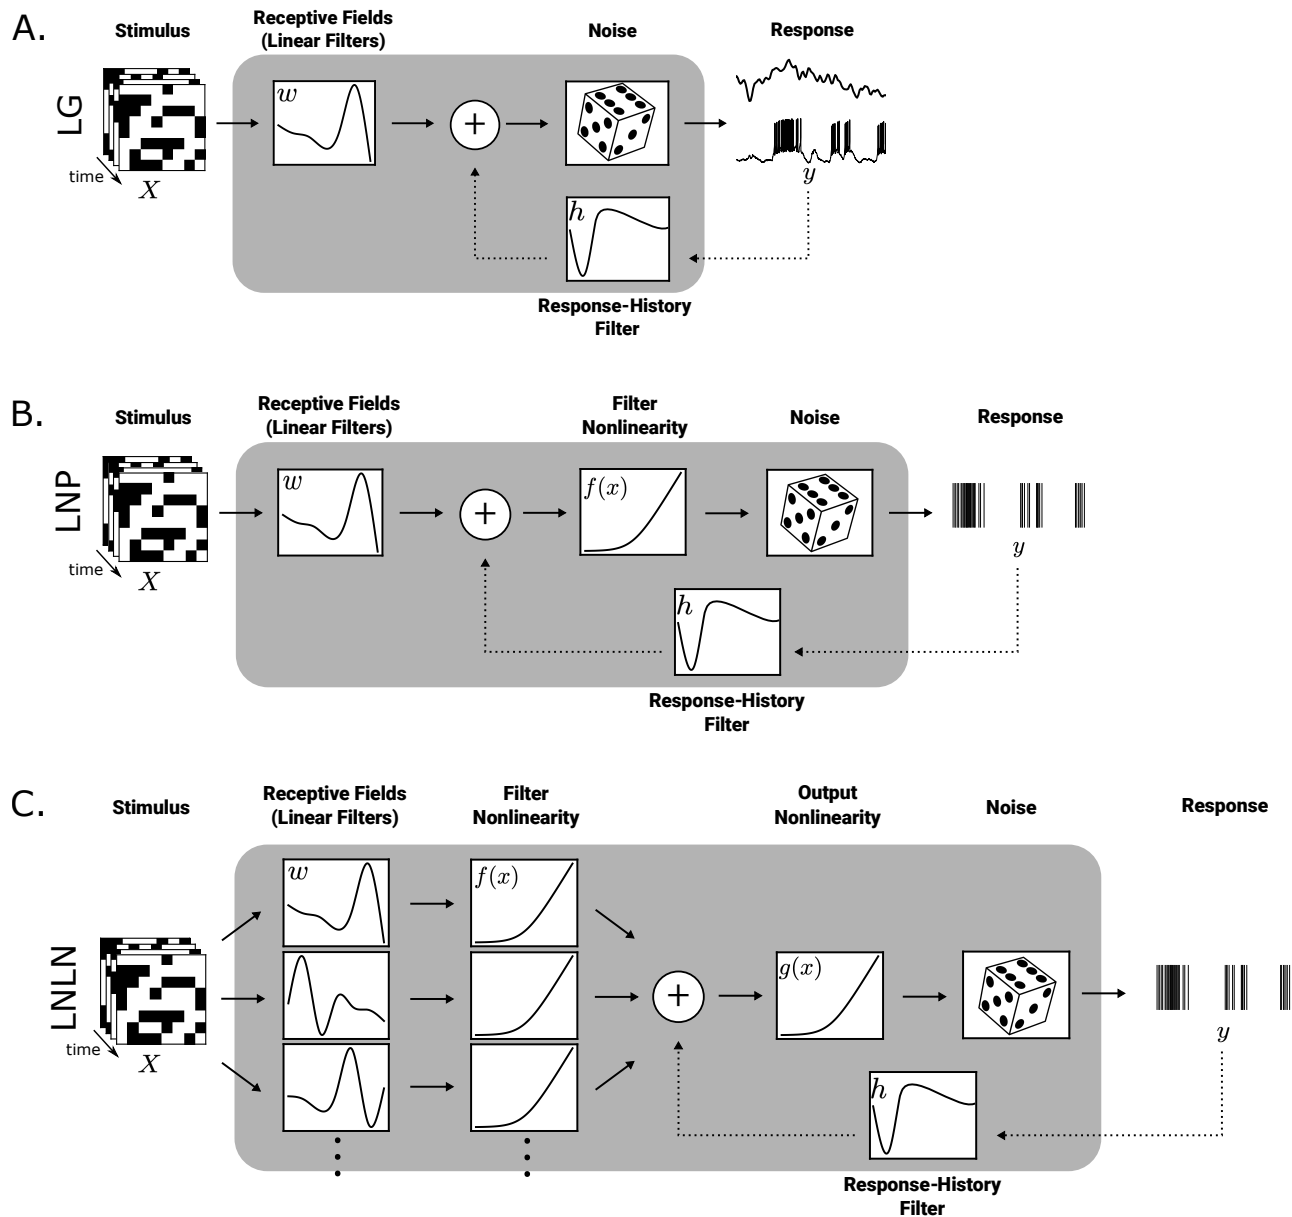

**Figure 1.** Overview of the different spatio-temporal receptive field (STRF) models used in this study. A. Linear-Gaussian (LG) encoding model.  $y = Xw + \varepsilon$ ,  $\varepsilon \sim N(0, \sigma^2)$ , where  $X$  is the stimulus design matrix,  $y$  the response,  $w$  the STRF. B. Linear-Nonlinear-Poisson (LNP) model.  $y = f(Xw)$ ,  $y \sim Poisson$ , where  $f(x)$  is the filter nonlinearity. C. Linear-Nonlinear-Linear-Nonlinear-Poisson (LNLN) model.  $y = g(\sum f(Xw))$ ,  $y \sim Poisson$ , where  $g$  is the output nonlinearity. Optionally, an autoregressive term convolving previous response with a response-history filter can be added before the nonlinearity to improve the model predictive performance.

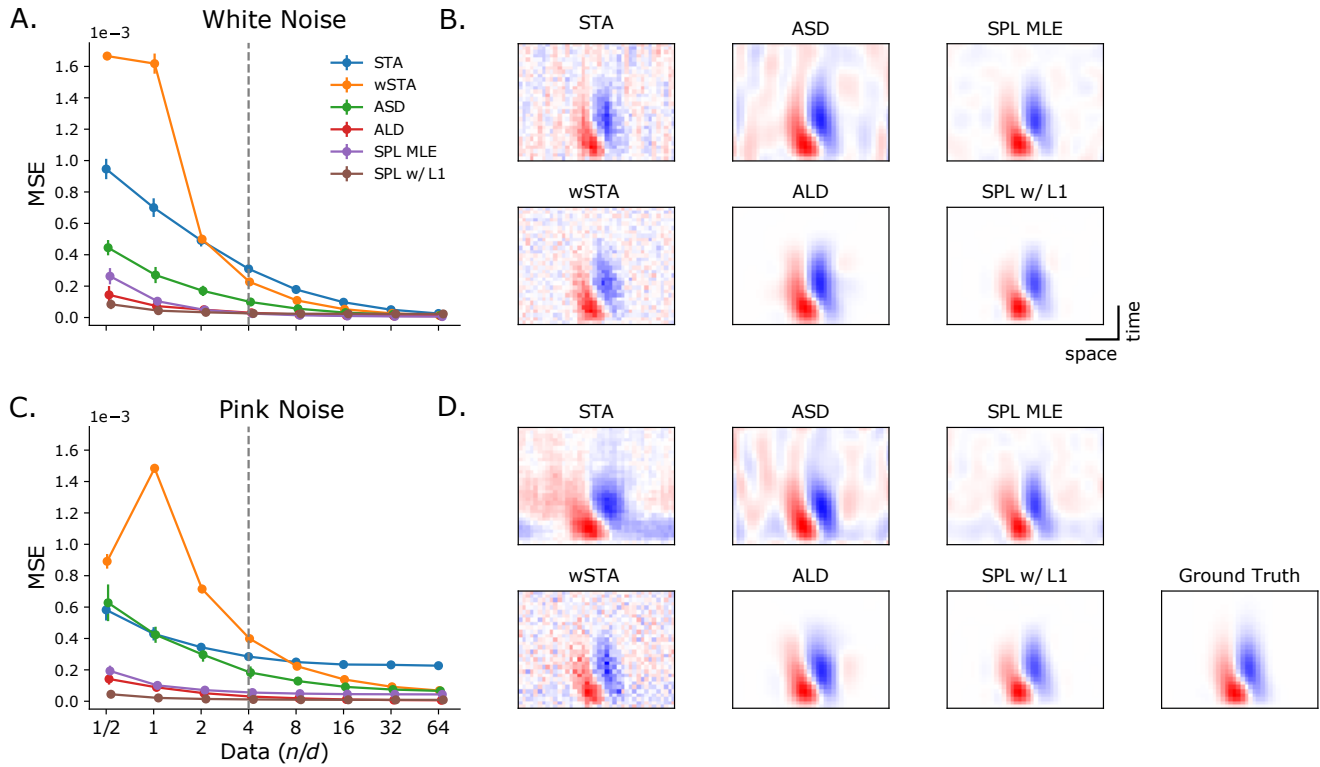

**Figure 2.** Linear-Gaussian (LG) Model. 2D simulated RF stimulated by white and pink noise in various lengths. A and C: Similarity (mean squared error, MSE) between ground Truth and estimated RFs with different length of simulated data, averaged over 10 trials with different random seeds. B and D: Example estimated RFs by different methods at  $n/d=4$ , indicated by vertical grey dash line in A and C.

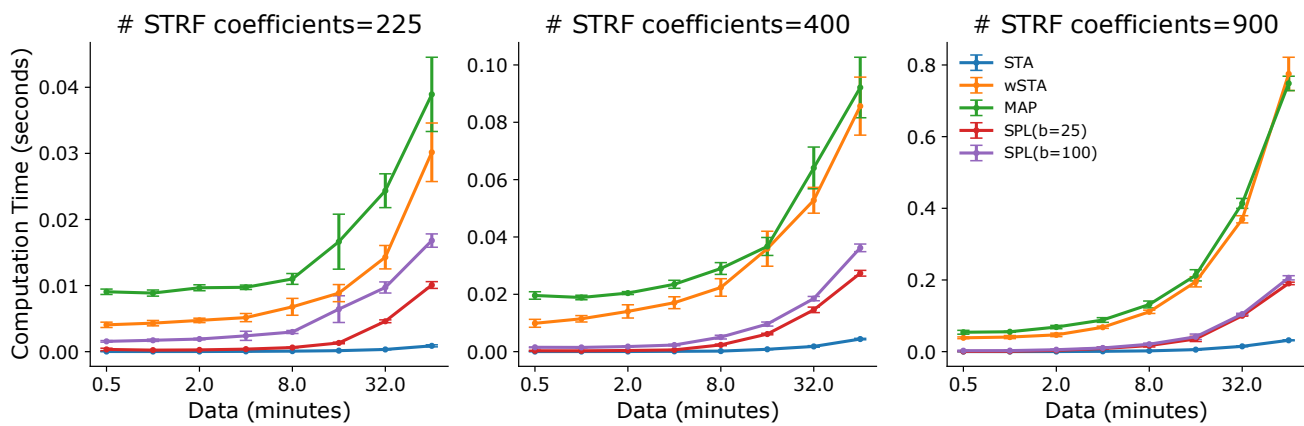

**Figure 3.** Comparison of computation time between different methods.

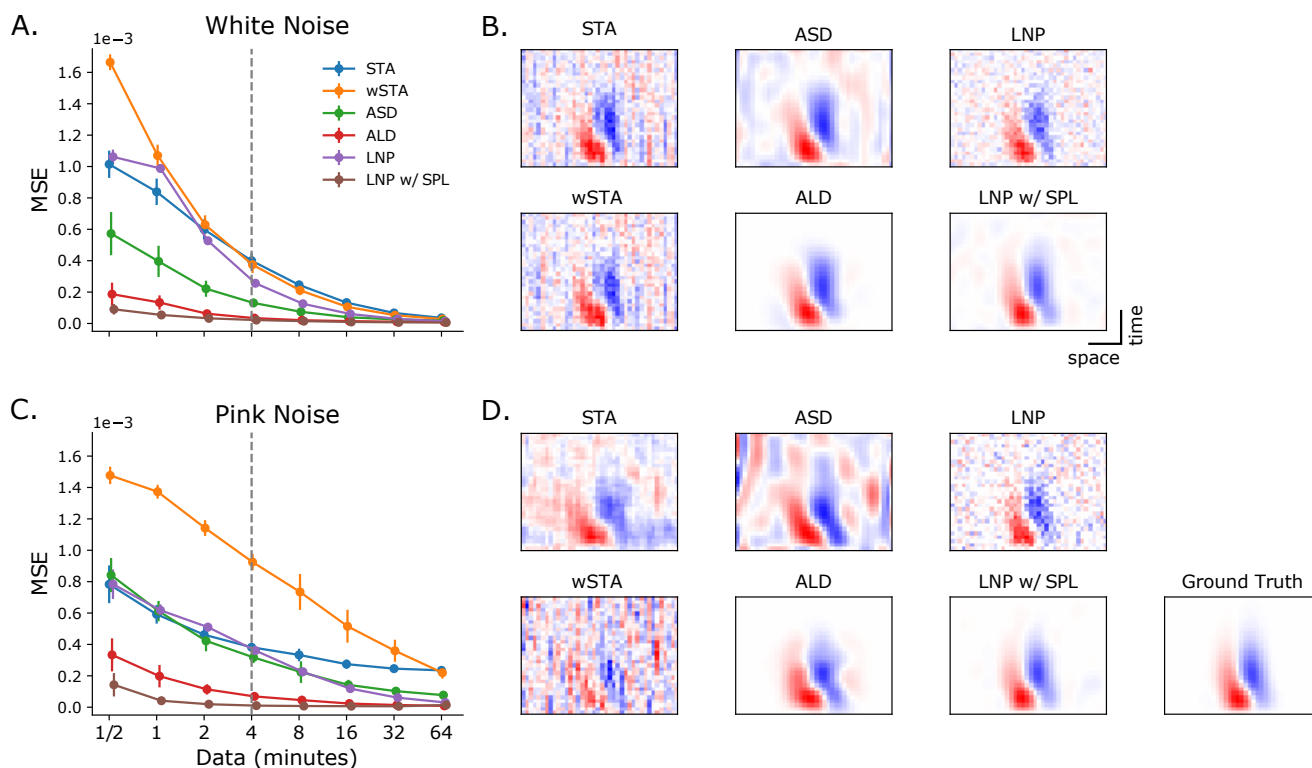

**Figure 4.** Linear-Nonlinear-Poisson (LNP) Model. 2D simulated RF stimulated by white noise and pink noise in various lengths. A and C: Details are the same as Figure 2. B and D: Example estimated RFs by different methods at data=4 minutes, indicated by vertical grey dash line in A and C.

the original ASD and ALD were not designed for the LNP but the LG model, nevertheless, they can still be applied to spike data as described above (with a model mismatch).

Again, we found that different methods resulted in estimates of different quality depending on the available amount of data (Figure 4). For both stimulus conditions, we found that the spline-based LNP yielded extremely data-efficient estimates of the linear filter compared to all other methods, and did so rapidly as only the coefficients for the spline basis functions needed to be optimized. In contrast, gradient-based optimization of an LNP model without spline basis, even with L1 regularization, performed only slightly better than the STA and wSTA computed under the mismatched LG model assumptions. The MAP estimators of ASD and ALD performed worse here compared to the LG case, likely because the MAP methods are optimized with respect to the mismatched cost function of the LG model. LNP w/ SPL achieved similar performance as SPL w/ L1 previously, as it is optimizing to the correct cost function, the negative log-likelihood of the LNP model.

We finally show how recently proposed subunit models (Figure 1C) can be made more efficient using a spline basis. We show this for a LNLN cascade model<sup>11,14</sup> and spike-triggered clustering or non-negative matrix factorization methods<sup>12,13</sup> and compare them without and with spline augmentation (see Methods 4.5). The assumption behind spike-triggered clustering methods is that each spike can be contributed by different subunits of a STRF, so that each subunit can be viewed as a mini-STA of a cluster of spikes. If this assumption holds, then a spline-approximated mini-STA should be able to serve as a better centroid for clustering, as the smoothed STA is closer to the ground truth subunit STRF. We used k-means clustering as a proof of concept in place of the previous published soft-clustering method<sup>13</sup> and used a multiplicative update rule<sup>15</sup> for semi-nonnegative matrix factorization (semi-NMF)<sup>12</sup>. Moreover, we modified the previous published semi-NMF<sup>12</sup> and imposed the nonnegative constraint to the weight matrix instead of the subunit matrix, which allowed us to retrieve antagonistic STRFs.

We simulated responses  $y$  with Poisson noise from the model by stimulating two  $20 \times 20$  pixels antagonistic center-surround subunits with different lengths of white noise stimuli. Both filter outputs first went through an exponential nonlinearity before summing together, then finally went through a softplus output nonlinearity.

We estimated subunit STRFs using k-means clustering or semi-NMF of the spike triggered ensemble, and maximum-likelihood estimation of the LNLN model directly, with or without a spline basis (Figure 5). Similar to the results from previous simulations, retrieved subunit STRFs from spline-based models were generally much more similar to the ground truth than

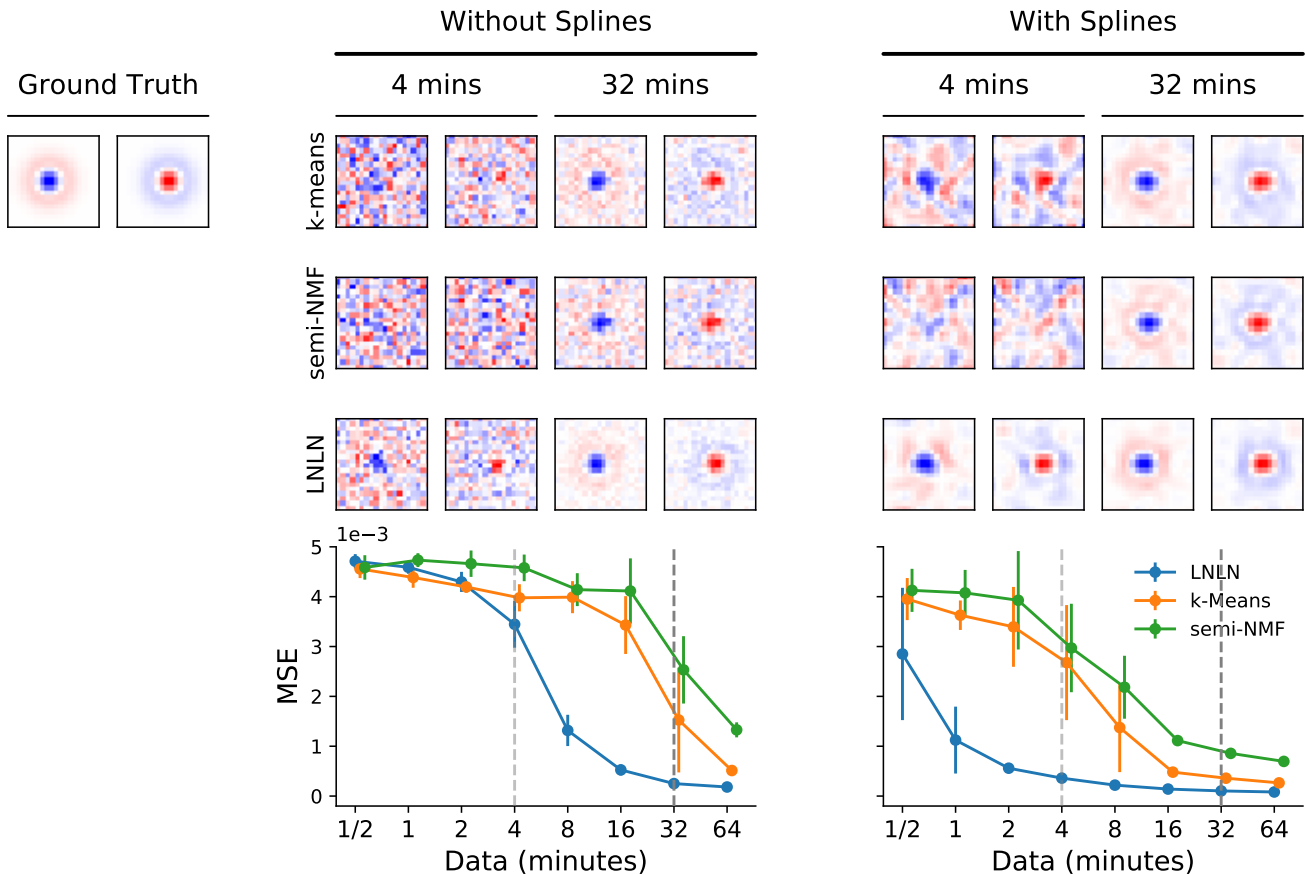

**Figure 5.** Subunit models. Two antagonistic Difference-of-Gaussian 2D RF stimulated by white noise. The subunits STRFs were estimated by k-means clustering, semi-NMF and LNLN, without and with spline. Example shown are estimated subunits by different methods at data = 4 and 32 minutes, indicated by vertical light and dark grey dash line in the bottom panel, respectively.

models without spline, and required smaller amount of data to achieve similar level of performance. For example, when using a spline basis, we were able to retrieve the two subunit filters at high quality using only 4 minutes of data. With this amount of data, all other methods still essentially showed only noise with a hint of signal in the estimate of the linear filter.

It is worth noting that also the computational efficiency of LNLN estimation was improved a lot by using a spline basis, as the number of coefficients to be estimated was significantly reduced, while the computation time for both spike-triggered clustering methods were actually decreased by incorporating splines, as computational steps were added to the original algorithms in those modified versions (see Methods 4.5).

## 2.2 Application to experimental data

We used gradient-based estimation for the parameters of spline-based LNP and LNLN models in three previously published experimental data sets: (1) extracellularly recorded spikes from tiger salamander retinal ganglion cells, stimulated by white noise flickering bars<sup>14</sup> (Figure 6A); (2) extracellular recorded spikes from V1 neurons of macaque monkeys, stimulated by binary flicker bars<sup>16</sup> (Figure 6B); (3) extracellular recorded spikes from tiger salamander retinal ganglion cells, stimulated by 3D non-repeat checkerboard white noise<sup>12</sup> (Figure 6C).

For all three data sets, only the first 10 minutes of the whole recording were used for fitting the models, another 2 minutes were used for model validation and another 4 sets of 2 minutes for testing. The predictive performance was measured by the averaged correlation coefficients of the predicted and measured responses. We compared the results of spline-based models with non-spline versions.

For visualization purposes, STRFs were first normalized to a unit vector by dividing the norm of themselves. For 3D STRFs from data set (3), we performed singular value decomposition (SVD) to separate the spatial and temporal components. The coordinates of the extremum pixel in the spatial component were selected, and the temporal filter of the original normalized



| Methods  | Stimuli Type     | Noise Distribution | Data needed | Complexity  | Multiple Filters |
|----------|------------------|--------------------|-------------|-------------|------------------|
| STA      | White Noise only | Gaussian           | a lot       | $O(n)$      | No               |
| wSTA     | Any              | Gaussian           | a lot       | $O(w^3)$    | No               |
| MAP      | Any              | Gaussian           | little      | $O(w^3)$    | No               |
| LNLN     | Any              | Poisson            | a lot       | $O((wk)^3)$ | Yes              |
| SPL LG   | Any              | Gaussian           | little      | $O(b^3)$    | No               |
| SPL LNP  | Any              | Poisson            | little      | $O(b^3)$    | No               |
| SPL LNLN | Any              | Poisson            | little      | $O((bk)^3)$ | Yes              |

**Table 1.** Model comparison. Here,  $n$  is the number of samples,  $w$  the number of STRF coefficients,  $b$  the number of spline basis coefficients and  $k$  the number of subunits. In most cases,  $b \ll w$ .

STRF is shown for those coordinates. For the spatial filter, we showed the frame of the original STRF at the extremum point of the temporal filter (indicated by a vertical dotted line). A contour was drawn on the spatial filter to illustrate the spatial extent of the STRF.

For all three example neurons shown, the spline-based LNP and LNLN consistently outperformed their no-spline versions (Figure 6). STRFs estimated by spline-based LNP and LNLN in general were smooth and sparse with a severely limited amount of data. In contrast, STRFs estimated by no-spline models were noisy and performed comparatively worse on prediction. This is especially prominent for LNLN estimates of data set (3), as here the number of parameters to estimate exceeded the amount of available data to fit the models. Interestingly, for the complex cell in V1 (Figure 6B), the LNLN model performed in general much better than the LNP model. This is expected, as the subunits of V1 complex cells tend to cancel each other and result in a flat STA<sup>16</sup>. The spline-LNLN only improved the performance very little, possibly because the number of subunits ( $k=4$ ) we set throughout in all examples might be an under-estimate for this data set, just as for data set (3).

### 3 Discussion

Here, we showed that natural cubic splines form a good basis for STRF estimation by solving one of the main challenges in sensory neuroscience: to efficiently estimate high-dimensional STRFs with limited data. Using this basis function set, we showed that inference for single filter LN-models with different noise models as well as LNLN cascade models can be efficiently performed from both spiking as well as two-photon imaging data, even if the signal-to-noise ratio is low (and see also how spline-based methods compare to previous methods in Table 1). We provide an implementation of the proposed methods in the RFEST-package for Python.

#### 3.1 Choice of basis functions

We chose the natural cubic spline basis to represent the linear filters as default in our toolbox, because among many other spline bases such as cyclic cubic splines, B-splines, or thin-plate splines, natural cubic splines have been shown to be the smoothest possible interpolant through any set of data and theoretically near-optimal to approximate any true underlying functions closely<sup>9</sup>. Conveniently, assuming all knots are spaced equally in each dimension, natural cubic splines only require setting one hyperparameter: the degree of freedom, or the number of basis functions. This is unlike the raised cosine basis used previously<sup>7</sup>, which is governed by multiple hyperparameters. Also, natural cubic splines can be easily extended to high-dimensional setting, also known as tensor product bases, by simply taking the row-wise Kronecker product of the basis matrix along each dimensions (see Method 4.3), making them uniquely suitable for estimating spatio-temporal receptive fields.

Through extensive validation with simulated and real experimental data sets, we showed that STRFs estimated with this basis can not only be more accurate than previous state-of-the-art methods but the estimation procedure was also computationally much more efficient in terms of both time and memory. The estimated STRFs were smoothed automatically, as they were the linear combination of a set of smooth basis functions. Further, sparsity and localization could often be achieved by adding a L1 regularization term to the loss function, which pushed the coefficient for the less relevant basis functions to zeros. Moreover, by parameterizing STRFs with basis functions, the number of coefficient could be significantly reduced, hence model fitting became much more computationally efficient, and the amount of data needed for the optimization to converge was also significantly less.

#### 3.2 Other approaches to efficient estimation of receptive fields

Similar to our approach, fast automatic smoothness determination (fASD)<sup>17</sup> has been suggested to speed up the process of evidence optimization in ASD. Because the smoothness prior covariance can be represented in frequency coordinates and many high frequency coefficients of the Fourier-transformed filter tend to be small, the size of the prior covariance matrix can be

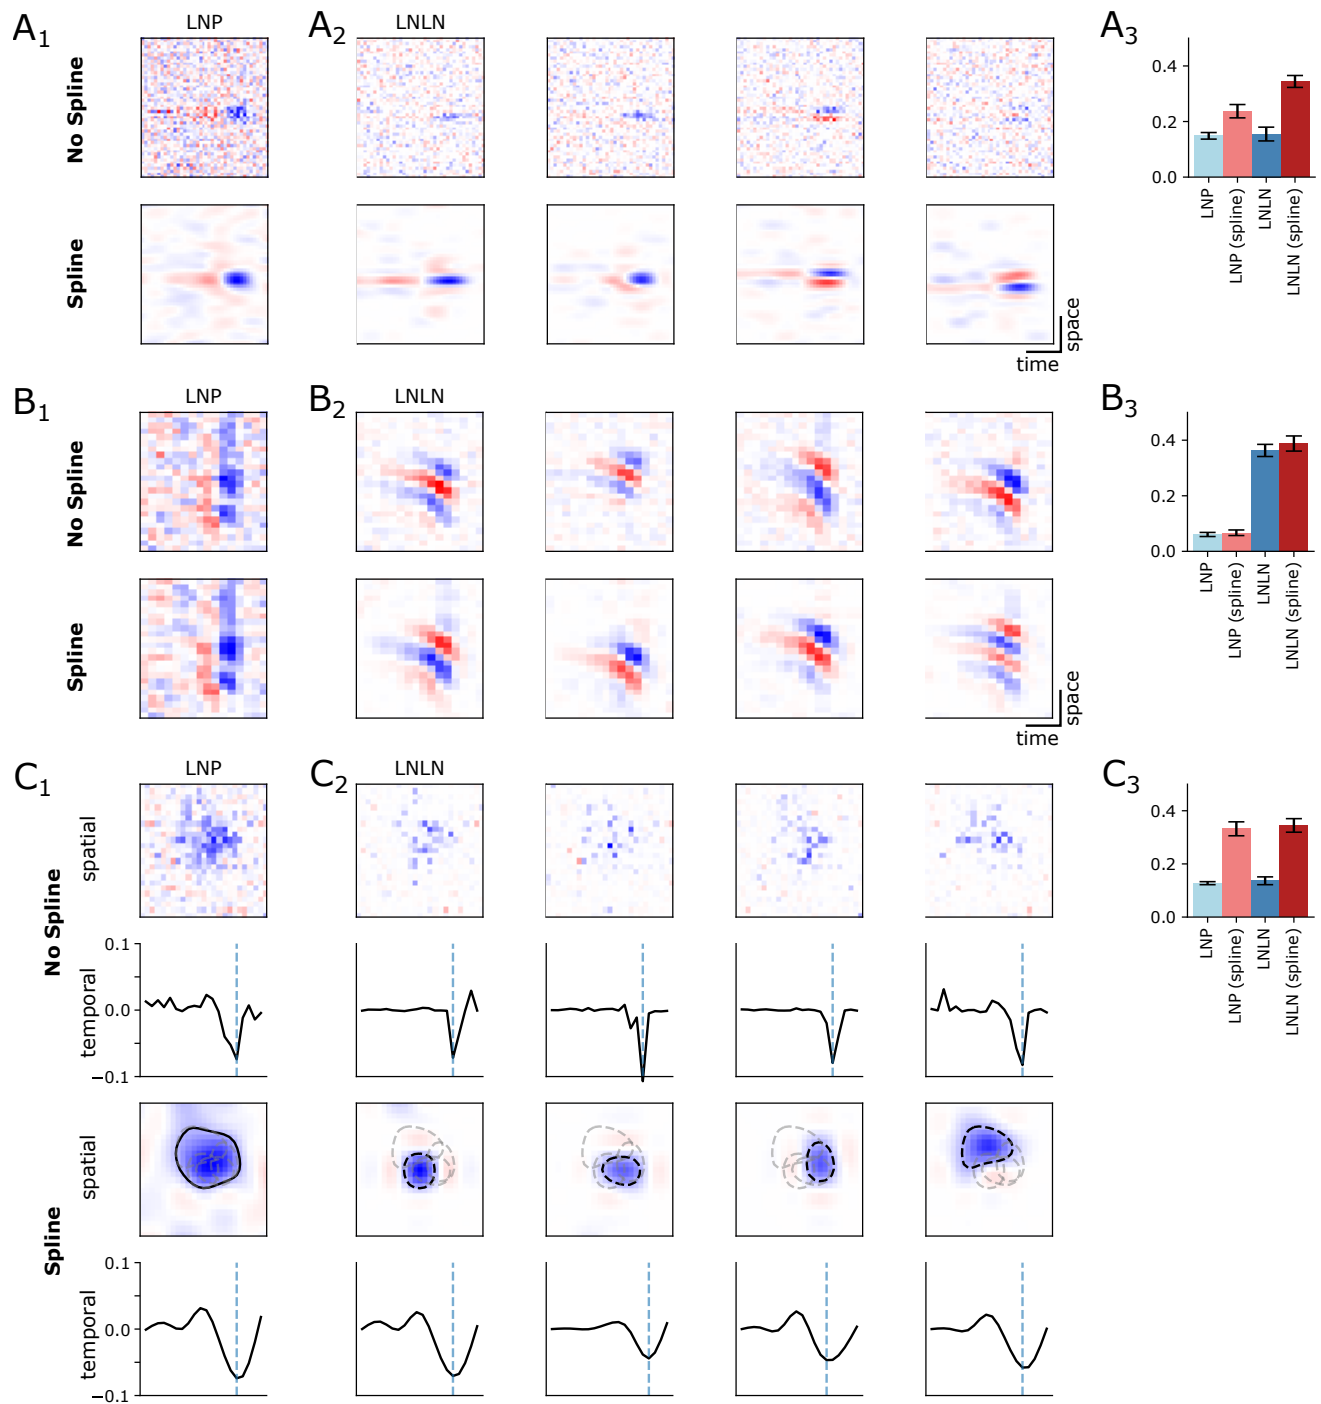

**Figure 6.** Spline-based LNP and LNLN consistently outperformed their no-spline versions on three example neurons from different data sets (see Methods 4.1 Experimental data for details). A<sub>1</sub>-C<sub>1</sub>: STRFs estimated from LNP with or without spline; A<sub>2</sub>-C<sub>2</sub> Subunit STRFs estimated from LNLN with or without spline, where number of subunits  $k=4$  for all cases; A<sub>3</sub>-C<sub>3</sub>: predictive performance comparison of LNP and LNLN with or without spline, measured by the averaged correlation coefficients of the test set response and the predictive ones.



reduced, leading to a speed up in the optimization process. However, as the efficiency of fASD is controlled completely by the initial frequency truncation, and the level of frequency to be truncated have to be fixed before the evidence optimization starts, one needs to resort back to grid search and cross-validation for choosing an good starting point, making the automatic hyperparameters selection via evidence optimization less automatic and comparable to the need to find the optimal degrees of freedom for the spline basis. Importantly, fASD is so far only applicable within the framework of linear model with Gaussian additive noise, while our approach is ready to use in nonlinear model with non-Gaussian noise, as shown for an LNLN model.

Regarding the inference for multiple STRFs in LNLN-cascade models, previous work has attempted to provide efficient algorithms by first retrieving subunit STRFS through spike-triggered clustering methods such as soft-clustering<sup>13</sup> or semi-NMF<sup>12</sup>. These were subsequently used to estimate other model parameters via gradient descent while holding the subunit STRFs fixed. Utilising only the collection of stimuli that elicit a spike, these approaches have advantages in terms of the computational cost in time and memory compared to the direct fitting of the complete model using gradient descent<sup>11,14</sup>.

The ease of using these algorithms relying on the spike-triggered ensemble under white noise stimulation is also the disadvantage of these approaches – they can only be applied to spike data under white noise stimulation. In many cases, experiments today record more diverse measurements from neurons, such as two-photon calcium imaging<sup>18,19</sup> or synaptic current recording<sup>20</sup> under more diverse types of stimulation, such as correlated noise and natural stimuli<sup>21</sup>. In those cases, spike-triggered analysis can not be used directly without modification, as the spike-triggered average is no longer the maximum likelihood estimate<sup>3</sup>. In contrast, our method does not rely on the Gaussianity of the stimulus or the discreteness of the response, and in principle can be generalized to other stimuli distribution and other response types.

In addition, current spike-triggered clustering methods rely on temporally collapsing the 3D stimuli to further reduce the model complexity, assuming all subunits share the same temporal response kernel. This limits the usability of these methods to some very specific cell types, and will not account for the spatio-temporal inseparable computation implemented by neurons receiving inputs from multiple sources, such as bi-stratified On-Off direction selective cell in the retina<sup>22</sup>. In this case, a more general approach such as our method is preferred.

### 3.3 Further extensions

Here, we only showcased how to estimate STRFs using natural cubic spline in a set of popular models with standard gradient descent with L1 regularization. This simple spline add-on can be directly incorporated into other previous models<sup>11,14</sup> with different constraints, regularization and optimization techniques, as it only changed the linear step of the models without modifying other parts.

To further improve model prediction performance, a response-history filter (as shown in Figure 1) and flexible nonlinearity can be added to the model, both of which can also be parameterized by a 1D spline basis. With such extra flexibility, a model can better adapt to the cell-specific firing threshold and adaptation to the stimulus ensemble. Still, even with the response-history filter, a STRF model can only account partially for the total variability of the neuronal responses, meaning such variability might be contributed from other sources. Future extension of the current GLM for STRFs can consider incorporating more diverse sources of behavioral data<sup>23</sup> of the experimental animal under experimental or naturalistic settings as 1D time-dependent filters.

## 4 Methods

### 4.1 Data sets

**Simulated data** For the simulated data shown in Figure 2 and 4, we used a STRF with 30 time frames and 40 pixels in space (as shown in both Figure as "ground truth") and generated responses with two types of flicker bar stimuli: Gaussian white noise and pink noise. We used a fixed exponential nonlinearity for LNP models. For Figure 5, we used two 20x20 pixels antagonistic center-surround STRF and only 2D Gaussian white noise was used as stimulus. We used a fixed exponential function for the filter nonlinearity and a softplus function for the output nonlinearity.

For all simulations, we measured the similarity of the ground truth STRF and the model estimators by computing the MSE between the two, after dividing by the norm of themselves.

For Figure 2, the similarity is measured at various length of stimulus ( $n_{\text{samples}}$ ), which were scaled by different factors (factor  $\in \{0.5, 1, 2, 4, 8, 16, 32, 64\}$ ) respect to the number of coefficients of the STRF. For Figure 4 and 5, the similarity is measured at various length of time (time  $\in \{0.5, 1, 2, 4, 8, 16, 32, 64\}$  minutes), which is equal to time =  $n_{\text{samples}} \times \Delta$ , where  $\Delta$  is the time bin size and took the value of 0.033 s.

Error bars in Figure 2-5 were obtained by averaging 10 trials of simulations with different random seeds.

**Experimental data** We used the following previously published data sets for Figure 6A-C:

1. Extracellularly recorded spikes from tiger salamander retinal ganglion cells<sup>14</sup>, available to download at <https://github.com/baccuslab/inferring-hidden-structure-retinal-circuits>;

2. Extracellular recorded spikes from V1 neurons of macaque monkeys<sup>16</sup>, available on request from the authors;
3. Extracellular recorded spikes from tiger salamander retinal ganglion cells<sup>12</sup>, available to download at [https://gin.g-node.org/gollischlab/Liu\\_et\\_al\\_2017\\_RGC\\_spiketrains\\_for\\_STNMF](https://gin.g-node.org/gollischlab/Liu_et_al_2017_RGC_spiketrains_for_STNMF)

## 4.2 Previous methods

**Spike-triggered Average (STA)** The STA was computed as the average of all stimuli that preceded a spike<sup>1</sup>:

$$w_{STA} = \frac{1}{n} X^T y \quad (1)$$

where  $X$  is the stimulus design matrix,  $y$  the response,  $n$  can be the number of spikes or the number of samples (rows) in  $X$  and  $y$  for non-spike data.

**Whitened spike-triggered average (wStA)** The maximum-likelihood estimator under a Gaussian noise model, or whitened-STA (wStA), was computed by multiplying the STA with the inverse of the stimulus auto-correlation matrix:

$$w_{MLE} = (X^T X)^{-1} X^T y \quad (2)$$

But in practice and in our code base, we did not compute the matrix inverse explicitly but compute the least squared solution instead.

**Maximum-a-posteriori estimator (MAP)** Similar, the MAP under a Gaussian noise model was computed by adding the inverse of the prior covariance to the stimulus auto-correlation matrix:

$$w_{MAP} = (X^T X + C^{-1})^{-1} X^T y \quad (3)$$

where  $C$  is a prior covariance matrix of choice, e.g. corresponding to a smoothness or sparseness assumption<sup>5,6</sup>. Its hyperparameters can be optimized by minimizing the negative log-evidence<sup>5,6</sup>:

$$\text{Cost}_{MAP} = \frac{n}{2} \log |2\pi\sigma^2| + \frac{1}{n} \log |C\Lambda^{-1}| - \frac{1}{n} \mu^T \Lambda \mu + \frac{1}{2\sigma^2} Y^T Y \quad (4)$$

where  $\sigma$  is variance of the additive Gaussian noise,  $\mu$  and  $\Lambda$  are posterior mean and covariance, respectively:

$$\mu = \frac{1}{\sigma} \Lambda X^T y \quad (5)$$

and

$$\Lambda = \left( \frac{1}{\sigma^2} X^T X + C^{-1} \right)^{-1} \quad (6)$$

**Smoothness prior covariance matrix for ASD** The 1D ASD prior covariance matrix is formulated as following<sup>5</sup>:

$$C_{ij} = \exp\left(-\rho - \frac{\Delta_{ij}}{2\delta^2}\right) \quad (7)$$

where  $\Delta_{ij}$  is the squared distance between STRF coefficients  $w_i$  and  $w_j$ ,  $\rho$  controls the scale and  $\delta$  controls the smoothness.

$$\begin{array}{lll}
 h_j = x_{j+1} - x_j & & \\
 a_j^-(x) = (x_{j+1} - x)/h_j & c_j^-(x) = [(x_{j+1} - x)^3/h_j - h_j(x_{j+1} - x)]/6 & \\
 a_j^+(x) = (x - x_j)/h_j & c_j^+(x) = [(x - x_j)^3/h_j - h_j(x - x_j)]/6 & \\
 D_{i,i} = 1/h_i & D_{i,i+1} = -1/h_i - 1/h_{i+1} & D_{i,i+2} = 1/h_{i+1} \\
 B_{i,i} = (h_i + h_{i+1})/3 & & i=1\dots k-2 \\
 B_{i,i+1} = h_{i+1}/6 & B_{i+1,i} = h_{i+1}/6 & i=1\dots k-3
 \end{array}$$

**Table 2.** Basis functions for natural cubic spline.

**Locality prior covariance matrix for ALD** The 1D ALD prior covariance matrix is formulated as following<sup>6</sup>:

$$C = C_s^{\frac{1}{2}} (B^T C_f B) C_s^{\frac{1}{2}} \quad (8)$$

where  $B$  is an orthogonal basis matrix for the 1D discrete Fourier transform,  $C_s$  and  $C_f$  are the diagonal ALD prior covariance in space and frequency, respectively, which can be constructed as:

$$C_{s,ii} = \exp\left(-\frac{1}{2\tau_s^2}(\chi_i - v_s)^2\right) \quad (9)$$

where  $\tau_s$  is scalar values control the shape and extent of the local region,  $\chi$  is the STRF coefficient coordinates in spacetime and  $v_s$  is center coordinate of the STRF. And

$$C_{f,ii} = \exp\left(-\frac{1}{2}(|\tau_f \omega_i| - v_f)^2\right) \quad (10)$$

where  $\tau_s$  is scalar values control the scale of smoothness in frequency,  $\omega$  is of STRF coefficient coordinates in frequency and  $v_f$  is center coordinate of the STRF in Fourier domain.

High-dimensional prior covariance matrix can be approximated by taking the Kronecker product ( $\otimes$ ) of the 1D covariance matrix in each dimension.

### 4.3 Estimating STRFs with Natural Cubic Regression Splines

To generate a natural cubic spline matrix ( $S$ ), we used the implementation from PATSY<sup>24</sup>, which is a Python equivalent of the original implementation in R package MCGV<sup>9</sup>. The only hyperparameter needed to generate a 1D spline basis matrix is the number of basis functions, or the degrees of freedom ( $df$ ), as we assume that all knots are equally-spaced.

$$S = a_j^-(x) + a_j^+(x) + c_j^-(x)F_j + c_j^+(x)F_{j+1} \text{ if } x_j < x \leq x < x_{j+1} \quad (11)$$

where  $S$  is the spline basis matrix,  $x$  is knot locations,  $F^{-1} = B^{-1}D$ ,  $F = (0, F^{-1}, 0)$  and  $a_j^-$ ,  $a_j^+$ ,  $c_j^-$ ,  $c_j^+$ ,  $B$ ,  $D$  are defined in Table 2.

An illustration of natural cubic splines can be seen in Figure 7. A spline-based STRF under a Gaussian noise model can be fitted in the similar manner as the wSTA:

$$b_{SPL,MLE} = (S^T X^T X S)^{-1} S^T X^T y \quad (12)$$

where  $b$  is the spline coefficients, and the corresponding RF is  $w_{SPL,MLE} = S b_{SPL,MLE} = S (S^T X^T X S)^{-1} S^T X^T y$ .

The spline matrix can be extended to high-dimensions, which is also called tensor product smooth<sup>9</sup>, by simply taking the Kronecker product ( $\otimes$ ) of the basis functions in each dimension:

$$S = S_t \otimes S_x \otimes S_y \quad (13)$$

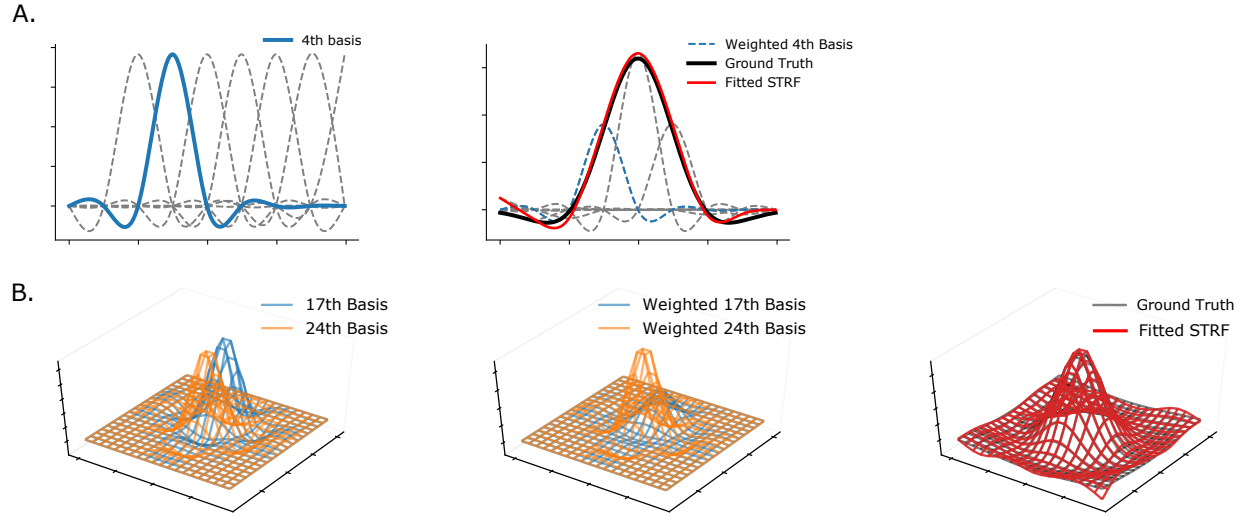

**Figure 7.** Illustration of the Natural cubic spline basis. A. 1D natural cubic spline. Left: a set of cubic spline basis, with the 4rd basis highlighted. Right: how basis functions are combined and fitted to a simulated 1D RF as a smooth curve. B. 2D natural cubic spline. Left: Two selected bases of 2D natural cubic spline. Middle: Weighted bases after fitted to a simulated 2D RF. Right: An example of a fitted 2D STRF overlaid on the Ground Truth.

#### 4.4 Spline-based GLMs with gradient descent

The spline coefficients can also be fitted by gradient descent with respect to the cost function defined in each model with added regularization through L1 and L2 penalties.

For the LG model, the cost function is the mean square error:

$$\text{Cost}_{LG} = \sum (y - X Sb)^2 / n + \beta [(1 - \alpha) \|b\|_2 + \alpha \|b\|_1] \quad (14)$$

where  $\alpha$  is the balancing weight for L1 and L2 regularizers,  $\beta$  is the overall weight of regularization.

For LNP and LNLN model, the cost function is the negative log-likelihood:

$$\begin{aligned} \lambda &= f(X Sb), \\ \text{Cost}_{LNP/LNLN} &= -y \log(\lambda) + \sum \Delta \lambda + \beta [(1 - \alpha) \|b\|_2 + \alpha \|b\|_1] \end{aligned} \quad (15)$$

where  $\lambda$  is the conditional intensity or the instantaneous firing rate,  $\Delta$  is the size of time bin, and  $f(\cdot)$  is a nonlinearity applied to the filter output, which can be fixed as a softplus or exponential nonlinearity or be parameterized by a set of spline basis ( $\phi$ ):

$$f(x) = \sum_{i=1}^{n_\phi} \alpha_i \phi_i(x) \quad (16)$$

where  $\alpha$  is basis weight.

We used JAX<sup>25</sup> for automatic differentiation and parameters optimization.

#### 4.5 Spline-based spike-triggered clustering methods

Both k-means clustering and semi-NMF can be formulated as a matrix factorization problem:

$$\min \|V_{\pm} - W_{\pm} H_{\pm}^T\|^2 \quad (17)$$

where  $V$  is the spike-triggered ensemble,  $W$  is clustering centroids matrix (or subunit matrix), and  $H$  is the clustering label (or subunit weight matrix). A spline basis can be easily incorporated into k-Means clustering by assuming that each centroid can

be approximated by the same spline basis matrix:  $W_{SPL,centroid} = SB$ , where  $B$  is the spline coefficient matrix for each subunit, and can be computed as the least-squares solution to the linear matrix equation  $B = S^\dagger W_{centroid}$ , where  $\dagger$  is pseudo-inverse. For semi-NMF, splines can also be combined with the update rules<sup>15</sup>:

$$W = SS^\dagger VH(H^T H)^{-1} \quad (18a)$$

$$H = H * \sqrt{\frac{(V^T W)^+ + [H(W^T W)^-]}{(V^T W)^- + [H(W^T W)^+]}} \quad (18b)$$

where  $*$  is point-wise multiplication,  $A^+ = (|A| + A)/2$  and  $A^- = (|A| - A)/2$ .

#### 4.6 Comparison of Computation Time

For comparison of computation time in Figure 3, we used simulated 2D RFs of different sizes (15x15, 20x20 and 30x30 pixels, respectively) and white noise stimuli. Simulations were carried out at different length of time in the same manner as Figure 4 and 5. The number of basis for SPL MLE were fixed as 5 and 10 along each dimension in all three cases. Measurements of computation time were averaged over 10 repetitions and performed on a 2019 16-inch MacBook Pro with a 2.3 GHz 8-core Intel Core i9 and 16 GB of RAM.

#### 4.7 Data availability

All data used, except the data set (2) shown in Figure 6B, are available in Github ([https://github.com/huangziwei/data\\_RFest](https://github.com/huangziwei/data_RFest)). Data set (2) is available on request from the authors of<sup>16</sup>.

#### 4.8 Code availability

All methods (spline-based GLMs, evidence optimization and spike-clustering methods) were implemented in Python3 and available in GitHub (<https://github.com/berenslab/RFest>). And Jupyter notebooks for all figures are available also in Github ([https://github.com/huangziwei/notebooks\\_RFest](https://github.com/huangziwei/notebooks_RFest))

### Acknowledgments

We thank the authors of<sup>14</sup>,<sup>12</sup> and<sup>16</sup> for making their data available. Research was funded by the Deutsche Forschungsgemeinschaft through a Heisenberg Professorship (BE5601/4-1 and BE5601/8-1, PB), the Collaborative Research Center 1233 “Robust Vision” (ref number 276693517) as well as individual research grants (EU 42/10-1, BE5601/6-1), the German Ministry of Education and Research through the Bernstein Award (01GQ1601, PB). PB is a member of the Excellence Cluster 2064 “Machine Learning — New Perspectives for Science” (ref number 390727645) and the Tübingen AI Center (FKZ: 01IS18039A) and funds from the Ministry of Science, Research and Arts of the State of Baden-Württemberg.

### References

1. Johnatan Aljadeff, Benjamin J. Lansdell, Adrienne L. Fairhall, and David Kleinfeld. Analysis of Neuronal Spike Trains, Deconstructed. *Neuron*, 91(2):221–259, July 2016.
2. Odelia Schwartz, Jonathan W. Pillow, Nicole C. Rust, and Eero P. Simoncelli. Spike-triggered neural characterization. *Journal of Vision*, 6(4):13–13, February 2006. Publisher: The Association for Research in Vision and Ophthalmology.
3. Liam Paninski. Convergence properties of three spike-triggered analysis techniques. *Network: Computation in Neural Systems*, 14(3):437–464, 2003. Publisher: Taylor & Francis.
4. Michael C.-K. Wu, Stephen V. David, and Jack L. Gallant. Complete functional characterization of sensory neurons by system identification. *Annu. Rev. Neurosci.*, 29:477–505, 2006. Publisher: Annual Reviews.
5. Maneesh Sahani and Jennifer Linden. Evidence optimization techniques for estimating stimulus-response functions. *Advances in neural information processing systems*, 15:317–324, 2002.
6. Mijung Park and Jonathan W. Pillow. Receptive field inference with localized priors. *PLoS Comput Biol*, 7(10):e1002219, 2011. Publisher: Public Library of Science.
7. Jonathan W. Pillow, Jonathon Shlens, Liam Paninski, Alexander Sher, Alan M. Litke, E. J. Chichilnisky, and Eero P. Simoncelli. Spatio-temporal correlations and visual signalling in a complete neuronal population. *Nature*, 454(7207):995–999, August 2008. Number: 7207 Publisher: Nature Publishing Group.

8. Ivar L. Thorson, Jean Liénard, and Stephen V. David. The Essential Complexity of Auditory Receptive Fields. *PLOS Computational Biology*, 11(12):e1004628, December 2015. Publisher: Public Library of Science.
9. Simon N. Wood. *Generalized additive models: an introduction with R*. CRC press, 2017.
10. Jonathan W. Pillow, Liam Paninski, Valerie J. Uzzell, Eero P. Simoncelli, and E. J. Chichilnisky. Prediction and Decoding of Retinal Ganglion Cell Responses with a Probabilistic Spiking Model. *Journal of Neuroscience*, 25(47):11003–11013, November 2005. Publisher: Society for Neuroscience Section: Behavioral/Systems/Cognitive.
11. James M. McFarland, Yuwei Cui, and Daniel A. Butts. Inferring Nonlinear Neuronal Computation Based on Physiologically Plausible Inputs. *PLOS Computational Biology*, 9(7):e1003143, July 2013. Publisher: Public Library of Science.
12. Jian K. Liu, Helene M. Schreyer, Arno Onken, Fernando Rozenblit, Mohammad H. Khani, Vidhyasankar Krishnamoorthy, Stefano Panzeri, and Tim Gollisch. Inference of neuronal functional circuitry with spike-triggered non-negative matrix factorization. *Nature Communications*, 8(1):149, July 2017. Number: 1 Publisher: Nature Publishing Group.
13. Nishal P Shah, Nora Brackbill, Colleen Rhoades, Alexandra Kling, Georges Goetz, Alan M Litke, Alexander Sher, Eero P Simoncelli, and EJ Chichilnisky. Inference of nonlinear receptive field subunits with spike-triggered clustering. *eLife*, 9:e45743, March 2020. Publisher: eLife Sciences Publications, Ltd.
14. Niru Maheswaranathan, David B. Kastner, Stephen A. Baccus, and Surya Ganguli. Inferring hidden structure in multilayered neural circuits. *PLOS Computational Biology*, 14(8):e1006291, August 2018. Publisher: Public Library of Science.
15. C. H. Q. Ding, T. Li, and M. I. Jordan. Convex and Semi-Nonnegative Matrix Factorizations. *IEEE Transactions on Pattern Analysis and Machine Intelligence*, 32(1):45–55, January 2010. Conference Name: IEEE Transactions on Pattern Analysis and Machine Intelligence.
16. Nicole C. Rust, Odelia Schwartz, J. Anthony Movshon, and Eero P. Simoncelli. Spatiotemporal elements of macaque v1 receptive fields. *Neuron*, 46(6):945–956, 2005. Publisher: Elsevier.
17. Mikio C. Aoi and Jonathan W. Pillow. Scalable Bayesian inference for high-dimensional neural receptive fields. *bioRxiv*, page 212217, November 2017. Publisher: Cold Spring Harbor Laboratory Section: New Results.
18. Tom Baden, Philipp Berens, Katrin Franke, Miroslav Román Rosón, Matthias Bethge, and Thomas Euler. The functional diversity of retinal ganglion cells in the mouse. *Nature*, 529(7586):345–350, January 2016. Number: 7586 Publisher: Nature Publishing Group.
19. Yanli Ran, Ziwei Huang, Tom Baden, Timm Schubert, Harald Baayen, Philipp Berens, Katrin Franke, and Thomas Euler. Type-specific dendritic integration in mouse retinal ganglion cells. *Nature Communications*, 11(1):2101, April 2020. Number: 1 Publisher: Nature Publishing Group.
20. Philipp Khuc Trong and Fred Rieke. Origin of correlated activity between parasol retinal ganglion cells. *Nature Neuroscience*, 11(11):1343–1351, November 2008. Number: 11 Publisher: Nature Publishing Group.
21. Yongrong Qiu, Zhijian Zhao, David Klindt, Magdalena Kautzky, Klaudia P. Szatko, Frank Schaeffel, Katharina Rifai, Katrin Franke, Laura Busse, and Thomas Euler. Mouse retinal specializations reflect knowledge of natural environment statistics. *bioRxiv*, page 2020.12.08.416172, December 2020. Publisher: Cold Spring Harbor Laboratory Section: New Results.
22. W. Rowland Taylor and David I. Vaney. Diverse Synaptic Mechanisms Generate Direction Selectivity in the Rabbit Retina. *Journal of Neuroscience*, 22(17):7712–7720, September 2002. Publisher: Society for Neuroscience Section: ARTICLE.
23. Edoardo Balzani, Kaushik Lakshminarasimhan, Dora Angelaki, and Cristina Savin. Efficient estimation of neural tuning during naturalistic behavior. *Advances in Neural Information Processing Systems*, 33, 2020.
24. N. J. Smith. *Patsy: describing statistical models in Python using symbolic formulas*, 2018.
25. James Bradbury, Roy Frostig, Peter Hawkins, Matthew James Johnson, Chris Leary, Dougal Maclaurin, and Skye Wanderman-Milne. *JAX: composable transformations of Python+ NumPy programs. Version 0.1*, 55, 2018.
